# Supplementary material
Source: PubMed Central journal article supplement (PMC3999287)

**Table S1.** Incidence of DAIDS Adverse Events

|                           | LPV/r      | NNRTI      | p-value |
|---------------------------|------------|------------|---------|
| Altered mental status     | 0.00 (0)   | 0.55 (1)   | n/a     |
| Anemia                    | 2.55 (5)   | 4.99 (9)   | 0.39    |
| Diarrhea                  | 0.51 (1)   | 1.11 (2)   | n/a     |
| Respiratory Distress      | 2.04 (4)   | 2.22 (4)   | 0.95    |
| Elevated ALT              | 1.53 (3)   | 3.32 (6)   | 0.26    |
| Elevated AST              | 0.51 (1)   | 0.55 (1)   | 0.95    |
| Leukopenia                | 0.51 (1)   | 1.11 (2)   | 0.51    |
| Low serum glucose         | 0.00 (0)   | 0.55 (1)   | n/a     |
| Neutropenia               | 24.00 (47) | 28.26 (51) | 0.42    |
| Severe malnutrition       | 0.00 (0)   | 0.55 (1)   | n/a     |
| Stevens Johnson Syndrome  | 0.00 (0)   | 0.55 (1)   | n/a     |
| Thrombocytopenia          | 8.17 (16)  | 3.87 (7)   | 0.14    |
| Unintentional weight Loss | 0.51 (1)   | 0.55 (1)   | n/a     |

Incidence per 100-person-years (# of events) of Division of HIV AIDS Grade III or IV adverse events<sup>10</sup>; P-value for comparison between arms using negative binomial regression; n/a comparison not possible.

Figure S1

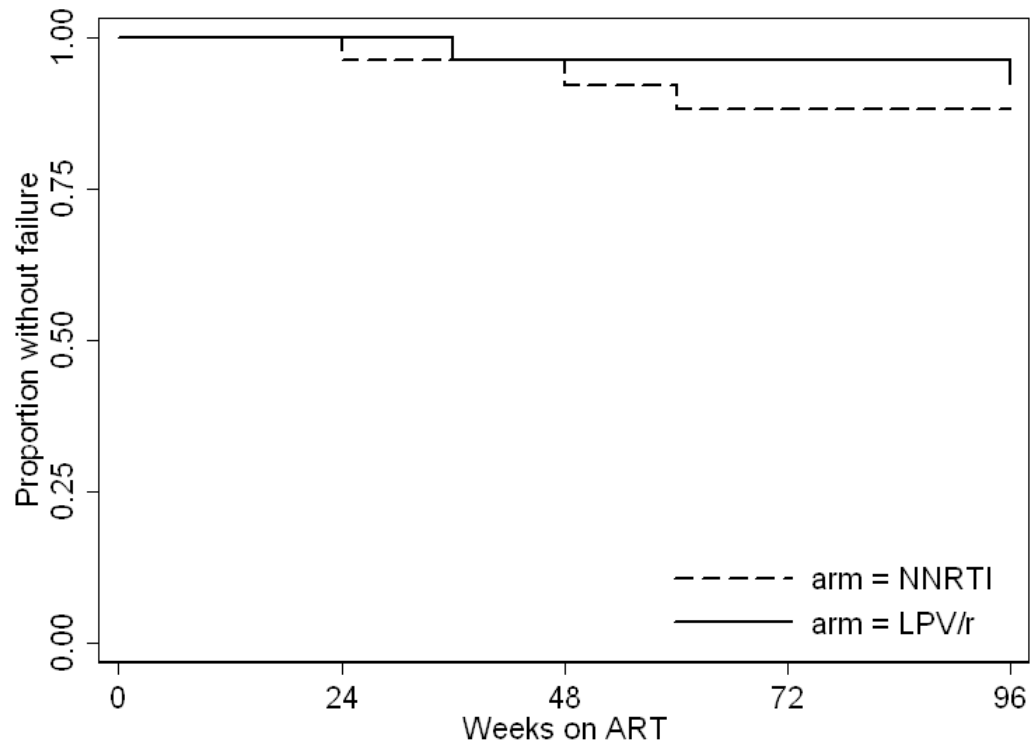

| Number at risk |  | 0  | 24 | 48 | 72 | 96 |
|----------------|--|----|----|----|----|----|
| arm = NNRTI    |  | 27 | 26 | 24 | 22 | 21 |
| arm = LPV/r    |  | 27 | 27 | 26 | 25 | 24 |

Figure S2a

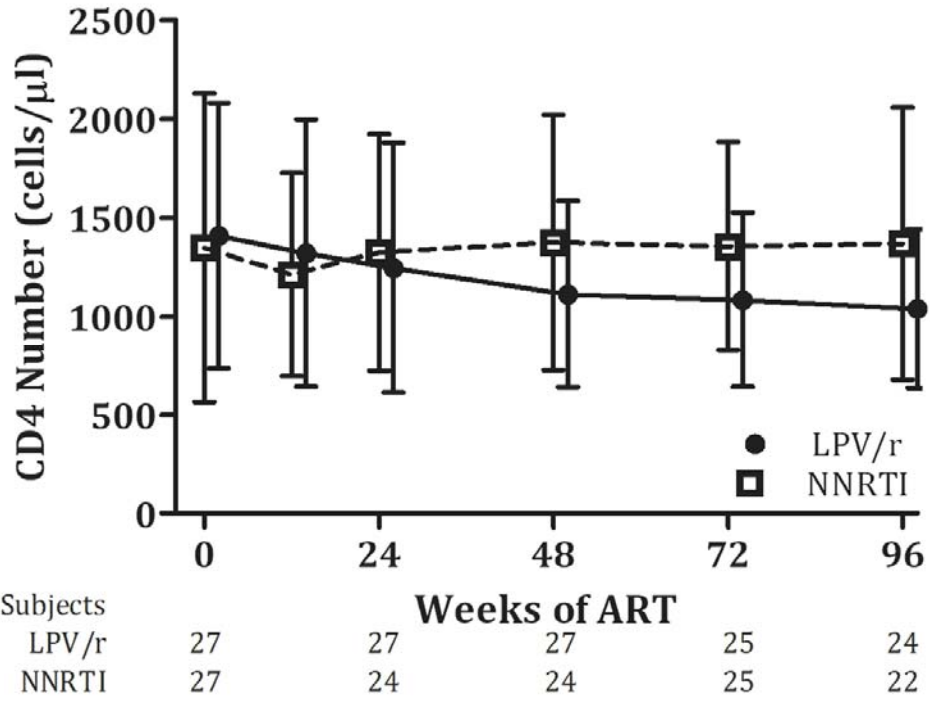

Figure S2b

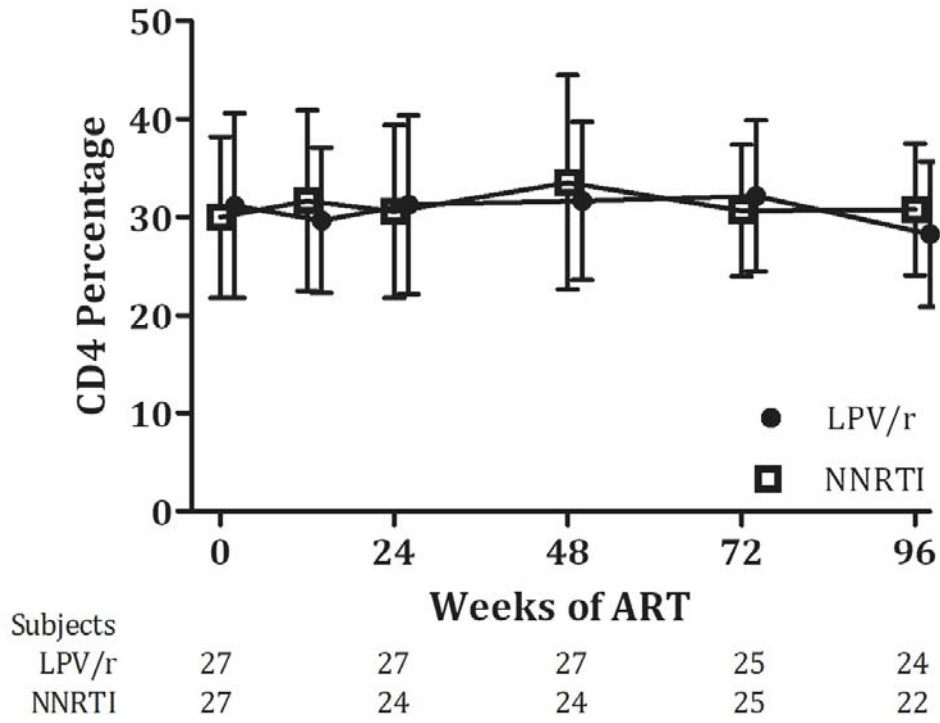

Supplement: NIHMS542890-supplement-Supp_1.pdf [file NIHMS542890-supplement-Supp_1.pdf]
